# Supplementary figures and images for: Development of a label-free Raman imaging technique for differentiation of malaria parasite infected from non-infected tissue
Source: Royal Society of Chemistry journal article supplement (doi:10.1039/c7an01760j), 2017-11-16

Figure S2:

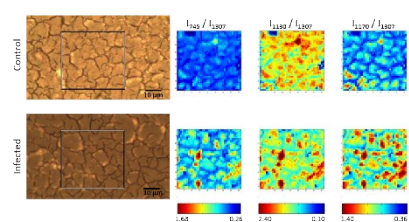

Supplement: c7an01760j3.pdf [file c7an01760j3.pdf]

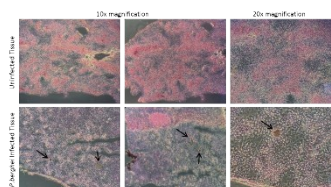

Supplement: c7an01760j6.pdf [file c7an01760j6.pdf]
